# Supplementary material
Source: PubMed Central journal article supplement (PMC9857695)
Supplement: jamapediatr-e225090-s001.pdf [file jamapediatr-e225090-s001.pdf]

## Supplemental Online Content

Recchia F, Bernal JDK, Fong DY, et al. Physical activity interventions to alleviate depressive symptoms in children and adolescents: a systematic review and meta-analysis. *JAMA Pediatr*. Published online January 3, 2023.  
doi:10.1001/jamapediatrics.2022.5090

**eFigure 1.** Preferred Reporting Items for Systematic Reviews and Meta-Analyses Flow Chart

**eFigure 2.** Forest Plot of the Distribution of Effect Sizes at Follow-up

**eFigure 3.** Funnel Plot of the Included Studies

**eFigure 4.** Risk of Bias of the Included Studies

**eTable 1.** Definitions and Codes for Primary and Secondary Moderators

**eTable 2.** Intervention Characteristics

**eAppendix 1.** Search Strategy

**eAppendix 2.** Risk of Bias Assessment

**eReference**

This supplemental material has been provided by the authors to give readers additional information about their work.

**eFigure 1.** Preferred Reporting Items for Systematic Reviews and Meta-Analyses Flow Chart

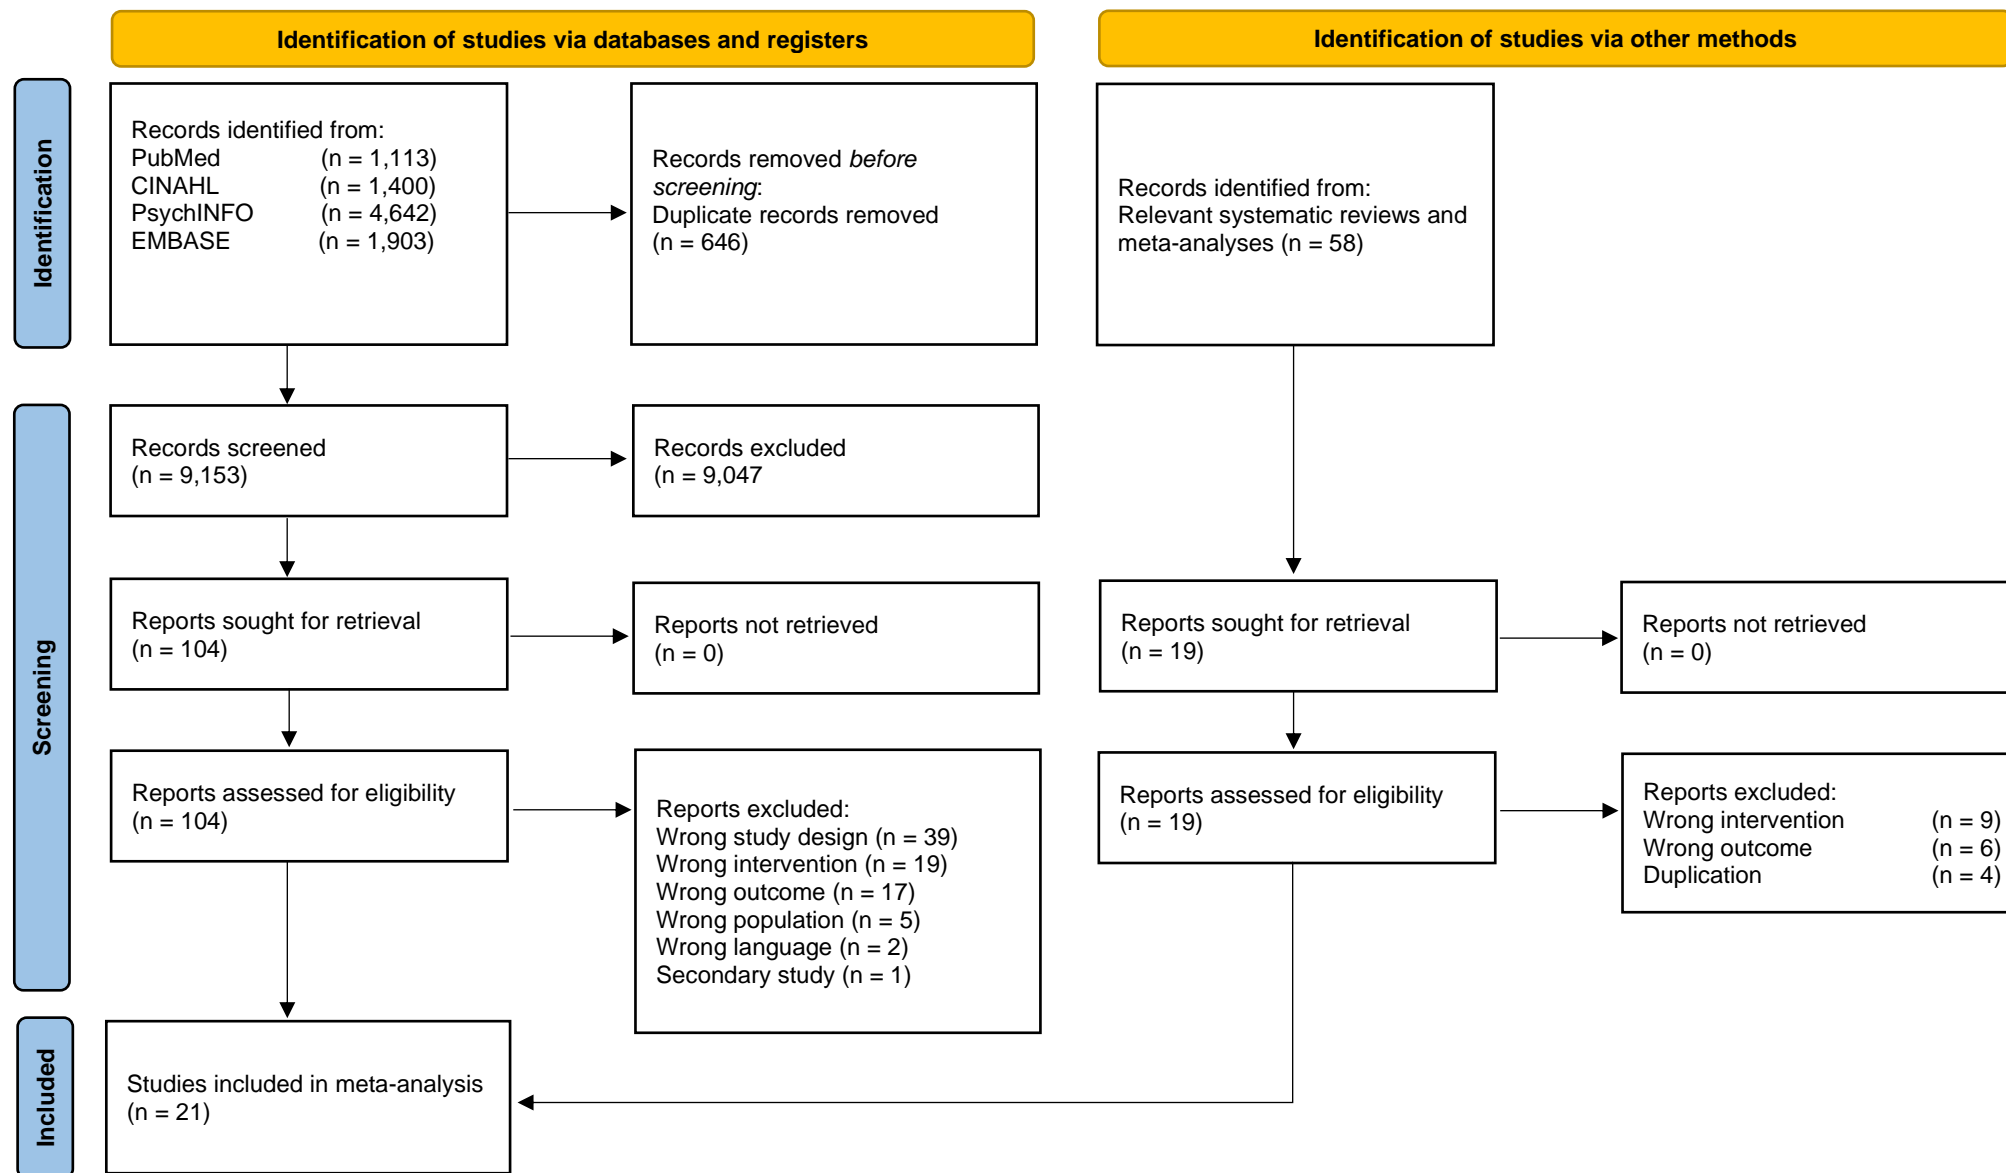

**eFigure 2.** Forest Plot of the Distribution of Effect Sizes at Follow-up

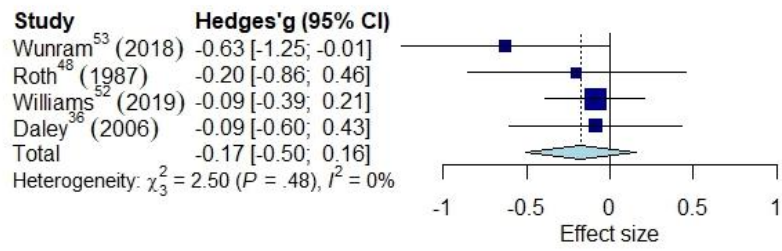

**eFigure 3.** Funnel Plot of the Included Studies

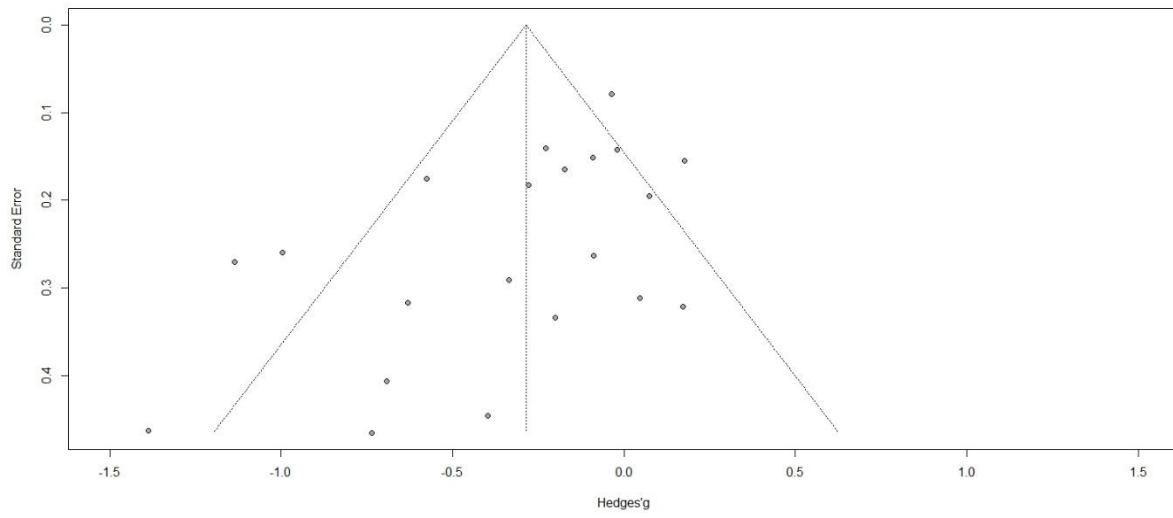

**eFigure 4.** Risk of Bias of the Included Studies

| <u>Study ID</u>     | <u>D1</u> | <u>D2</u> | <u>D3</u> | <u>D4</u> | <u>D5</u> | <u>Overall</u> |                                               |
|---------------------|-----------|-----------|-----------|-----------|-----------|----------------|-----------------------------------------------|
| Bonhauer (2005)     | !         | +         | +         | !         | +         | !              | Low risk                                      |
| Daley (2006)        | +         | +         | +         | +         | +         | +              | Some concerns                                 |
| Goldfield (2015)    | !         | +         | +         | +         | +         | !              | High risk                                     |
| Hughes (2013)       | +         | +         | +         | +         | +         | +              |                                               |
| Mohammadi (2011)    | !         | +         | +         | !         | !         | !              | D1 Randomisation process                      |
| Nabkasorn (2006)    | !         | !         | +         | !         | +         | !              | D2 Deviations from the intended interventions |
| Norris (1992)       | !         | +         | !         | !         | !         | -              | D3 Missing outcome data                       |
| Olive (2019)        | +         | +         | !         | +         | +         | !              | D4 Measurement of the outcome                 |
| Peng (2015)         | !         | +         | +         | !         | +         | !              | D5 Selection of the reported result           |
| Petty (2009)        | +         | +         | +         | !         | !         | !              |                                               |
| Romero-Perez (2020) | !         | +         | +         | !         | +         | !              |                                               |
| Roshan (2011)       | !         | +         | +         | !         | +         | !              |                                               |
| Roth (1987)         | !         | +         | +         | !         | !         | !              |                                               |
| Silva (2020)        | !         | +         | !         | !         | !         | -              |                                               |
| Talakoub (2012)     | !         | +         | +         | !         | +         | !              |                                               |
| Weintraub (2008)    | +         | +         | +         | +         | +         | +              |                                               |
| Williams (2019)     | +         | +         | +         | +         | +         | +              |                                               |
| Wunram (2018)       | +         | +         | +         | +         | +         | +              |                                               |
| Yu (2020)           | +         | +         | +         | +         | +         | +              |                                               |
| Zhang (2021)        | !         | +         | +         | +         | +         | !              |                                               |
| Lin (2020)          | !         | +         | +         | !         | +         | !              |                                               |

**eTable 1.** Definitions and Codes for Primary and Secondary Moderators

| <b>Primary moderators</b>                       | <b>Definition</b>                                                                                                                                     |
|-------------------------------------------------|-------------------------------------------------------------------------------------------------------------------------------------------------------|
| <b>Health status</b>                            |                                                                                                                                                       |
| Healthy                                         | Participants did not present any primary physical or mental condition                                                                                 |
| Ill                                             | Participants had at least one physical or mental condition                                                                                            |
| <b>Total physical activity volume</b>           | Session duration x intervention duration x frequency                                                                                                  |
| <b>Allocation and/or assessment concealment</b> |                                                                                                                                                       |
| Yes                                             | Participant randomization and/or outcome assessments were reported as blinded                                                                         |
| No                                              | Neither participant randomization nor outcome assessments were reported as blinded                                                                    |
| <b>Study design</b>                             |                                                                                                                                                       |
| RCT                                             | The study was a randomized controlled trial                                                                                                           |
| QRCT                                            | The study was a quasi-randomized controlled trial                                                                                                     |
| <b>Secondary moderators</b>                     | <b>Definition</b>                                                                                                                                     |
| <b>Sex</b>                                      |                                                                                                                                                       |
| Mixed                                           | Participants randomized were both male and female                                                                                                     |
| Female                                          | Participants randomized were all female                                                                                                               |
| <b>Age</b>                                      |                                                                                                                                                       |
| < 14                                            | Participants were younger than 14 years old                                                                                                           |
| ≥ 14                                            | Participants were 14 years old or older                                                                                                               |
| <b>Health</b>                                   |                                                                                                                                                       |
| Healthy                                         | Participants were healthy                                                                                                                             |
| Physical illness                                | Participants presented a primary physical illness                                                                                                     |
| Mental illness                                  | Participants presented a primary mental illness                                                                                                       |
| <b>Depression diagnosis</b>                     |                                                                                                                                                       |
| Yes                                             | Participants had a clinical diagnosis of depression                                                                                                   |
| No                                              | Participants did not have a clinical diagnosis of depression                                                                                          |
| <b>Monotherapy</b>                              |                                                                                                                                                       |
| Yes                                             | The physical activity intervention was administered as a monotherapy                                                                                  |
| No                                              | The physical activity intervention was administered in combination with another intervention                                                          |
| <b>Supervision</b>                              |                                                                                                                                                       |
| Fully supervised                                | The physical activity intervention was fully supervised                                                                                               |
| Partially supervised                            | The physical activity intervention was partially supervised                                                                                           |
| Not supervised                                  | The physical activity intervention was not supervised                                                                                                 |
| <b>Control</b>                                  |                                                                                                                                                       |
| Usual care                                      | The control condition involved the continuation of the treatment that participants were undergoing prior to joining the study (e.g., pharmacotherapy) |
| Attention                                       | The control condition involved some activities of lower intensity, time and/or contacts than the intervention activities (e.g., health education)     |
| Wait-list                                       |                                                                                                                                                       |

|                         |                                                                                                                                            |
|-------------------------|--------------------------------------------------------------------------------------------------------------------------------------------|
|                         | Participants did not receive the intervention, but were put on a waiting list to receive the intervention after the active treatment group |
| No intervention         | Participants did not receive any intervention                                                                                              |
| <b>ITT</b>              |                                                                                                                                            |
| Yes                     | Intention-to-treat analyses were used                                                                                                      |
| No                      | No intention-to-treat analyses were used                                                                                                   |
| <b>Frequency</b>        |                                                                                                                                            |
| 2 days/week             | The physical activity intervention was conducted two times per week                                                                        |
| 3 days/week             | The physical activity intervention was conducted three times per week                                                                      |
| ≥ 4 days/week           | The physical activity intervention was conducted four or more times per week                                                               |
| <b>Session duration</b> |                                                                                                                                            |
| < 45 minutes            | Each physical activity session lasted less than 45 minutes                                                                                 |
| ≥ 45 minutes            | Each physical activity session lasted 45 minutes or more                                                                                   |
| <b>Duration</b>         |                                                                                                                                            |
| < 12 weeks              | The physical activity intervention lasted less than 12 weeks                                                                               |
| ≥ 12 weeks              | The physical activity intervention lasted 12 weeks or more                                                                                 |
| <b>Intensity</b>        |                                                                                                                                            |
| Low-Moderate            | Physical activity intensity was reported as low or moderate                                                                                |
| Vigorous                | Physical activity intensity was reported as vigorous                                                                                       |
| Not reported            | Physical activity intensity was not reported                                                                                               |

**eTable 2.** Intervention Characteristics

| Study            | Intervention                                                                                                                                                                                                                                                                                                                                                                                                      | 1. Session duration<br>2. Frequency<br>3. Intervention duration<br>4. Intensity                 | Delivered by                             | Control                                                                                                                                                                                             | Delivered by     | Setting                                                                                                                                    |
|------------------|-------------------------------------------------------------------------------------------------------------------------------------------------------------------------------------------------------------------------------------------------------------------------------------------------------------------------------------------------------------------------------------------------------------------|-------------------------------------------------------------------------------------------------|------------------------------------------|-----------------------------------------------------------------------------------------------------------------------------------------------------------------------------------------------------|------------------|--------------------------------------------------------------------------------------------------------------------------------------------|
| Bonhauser (2005) | Four units of 30 sessions each. Sessions in each unit included:<br>1) No weight transfer activities: stretching and arm, leg, and trunk movements<br>2) Weight transfer activities: fast walking, running and jumping<br>3) Sports practice: Dance, aerobics, track practice and volleyball for females AND soccer, basketball, track practice and volleyball for males (sports varied depending on current unit) | 1. 90 minutes<br>2. 3 sessions/week<br>3. 40 weeks (10 weeks x 4 units)<br>4. Moderate-Vigorous | Teachers                                 | 90-min standard exercise class performed once/week<br><br>Mixed activities, including general training (running, jumping), playing games and practicing sports that changed from session to session | Teachers         | Urban public school located in a low socioeconomic area in Santiago, Chile<br><br>Interventions delivered as part of the school curriculum |
| Daley (2006)     | Short bouts of intermittent aerobic activities e.g., (stepping, cycling, rowing, dance mat, and walking) and mini games<br><br>Exercise counselling for behavior change was also an integral part of the exercise sessions                                                                                                                                                                                        | 1. 30 minutes<br>2. 3 sessions/week<br>3. 8 weeks<br>4. 40%-59% of HR reserve                   | One researcher                           | Usual care – participants were asked to continue with their lives as normal                                                                                                                         | NA               | Exercise therapy room housed at an English University                                                                                      |
| Goldfield (2015) | Aerobic exercise on treadmills, elliptical machines, and/or bicycle ergometers + 5-10 minutes of warm-up and cool-down (light exercise and stretching)<br><br>Participants gradually increased the duration and intensity of exercise in each session<br><br>All participants attended an initial visit with a dietitian to set dietary goals and received individually-tailored dietary advice                   | 1. 20-45 minutes<br>2. 4 sessions/week<br>3. 22 weeks<br>4. 65%-85% of HR max                   | Certified fitness trainers and dietitian | Participants followed the same eating plan as those in the exercise group                                                                                                                           | Dietitian        | Local gyms<br><br>The cost of the membership was covered by the research grant                                                             |
| Hughes (2013)    | Exercise on treadmills or stationary bikes + home-based exercise sessions (e.g., Wii Sports and Fit, jazzercise, jogging, weight training)                                                                                                                                                                                                                                                                        | 1. 30-40 minutes<br>2. 3 sessions/week<br>3. 12 weeks<br>4. 12 kcal/kg/week                     | Exercise trainer                         | Full-body stretching with same duration and frequency as the intervention group but with intensity of 4 kcal/kg/week                                                                                | Exercise trainer | Cooper Institute for preventive medicine and public health<br><br>Part of the intervention was performed at home                           |
| Lin (2020)       | Moderate-intensity running                                                                                                                                                                                                                                                                                                                                                                                        | 1. 30 minutes<br>2. 4 sessions/week<br>3. 12 weeks<br>4. 50%-70% of HR max                      | Research staff                           | General psychoeducation (i.e., group game, poetry reading and singing)                                                                                                                              | Research staff   | Middle school in Guangzhou, China                                                                                                          |



|                  |                                                                                                                                                                                                                                                                                                                                                                                                                                                                                                                                                                                                                                                                                                                                                                                                                                                                                          |                                                                                                                                                                   |                                                           |                                                                                                                               |                                |                                                                                                                                                             |
|------------------|------------------------------------------------------------------------------------------------------------------------------------------------------------------------------------------------------------------------------------------------------------------------------------------------------------------------------------------------------------------------------------------------------------------------------------------------------------------------------------------------------------------------------------------------------------------------------------------------------------------------------------------------------------------------------------------------------------------------------------------------------------------------------------------------------------------------------------------------------------------------------------------|-------------------------------------------------------------------------------------------------------------------------------------------------------------------|-----------------------------------------------------------|-------------------------------------------------------------------------------------------------------------------------------|--------------------------------|-------------------------------------------------------------------------------------------------------------------------------------------------------------|
|                  |                                                                                                                                                                                                                                                                                                                                                                                                                                                                                                                                                                                                                                                                                                                                                                                                                                                                                          |                                                                                                                                                                   |                                                           |                                                                                                                               |                                | Interventions were performed in the afternoon in the school playground, after class                                                                         |
| Mohammadi (2011) | Sport activities (soccer, volleyball, table tennis and badminton)                                                                                                                                                                                                                                                                                                                                                                                                                                                                                                                                                                                                                                                                                                                                                                                                                        | <ol style="list-style-type: none"> <li>1. 75 minutes</li> <li>2. 3 sessions/week</li> <li>3. 8 weeks</li> <li>4. NR</li> </ol>                                    | NR                                                        | No intervention                                                                                                               | NR                             | NR                                                                                                                                                          |
| Nabkasorn (2005) | <ol style="list-style-type: none"> <li>1) 5-10 minutes of warm-up</li> <li>2) 30 minutes of group jogging</li> <li>3) 5-10 minutes of cool-down</li> </ol>                                                                                                                                                                                                                                                                                                                                                                                                                                                                                                                                                                                                                                                                                                                               | <ol style="list-style-type: none"> <li>1. 50 minutes</li> <li>2. 5 sessions/week</li> <li>3. 8 weeks</li> <li>4. &lt; 50% of max HR reserve</li> </ol>            | Physical fitness instructors                              | Usual care                                                                                                                    | NR                             | University nursing program in Chonburi, Thailand                                                                                                            |
| Norris (1991)    | High-intensity and moderate intensity aerobic exercise                                                                                                                                                                                                                                                                                                                                                                                                                                                                                                                                                                                                                                                                                                                                                                                                                                   | <ol style="list-style-type: none"> <li>1. 25-30 minutes</li> <li>2. 2 sessions/week</li> <li>3. 10 weeks</li> <li>4. 70%-75% HR max and 50%-60% HR max</li> </ol> | Experienced fitness instructor                            | Flexibility training with same duration and frequency as the intervention group but with little or no increases in heart rate | Experienced fitness instructor | Local high-school<br><br>As the interventions took place during school hours, participants were organized into groups based upon mutual free lesson periods |
| Olive (2019)     | <p>Sessions were based on 5 components:</p> <ol style="list-style-type: none"> <li>1) Coordination and agility drills (i.e., crawling, climbing, running, hopping, stepping, skipping, rope-skipping and jumping)</li> <li>2) Skill activities (i.e., hitting, kicking, throwing, juggling and catching with a variety of objects)</li> <li>3) Movement challenges and games (designed to promote aerobic fitness, cooperation, teamwork and problem solving)</li> <li>4) Core movement (i.e., yoga-like practices to develop muscular strength, flexibility, balance and postural control)</li> <li>5) Dynamic movement control (i.e., gymnastic-based activities to develop rhythm and balance)</li> </ol> <p>Emphasis on balance and gross motor skills as well as fine motor skills<br/>Each lesson dedicated time to a reflective discussion related to the movement experience</p> | <ol style="list-style-type: none"> <li>1. 50 minutes</li> <li>2. 2 sessions/week</li> <li>3. 4 years</li> <li>4. NR</li> </ol>                                    | University-qualified PE teachers with additional training | Physical education class once per week for 30 minutes                                                                         | Teachers                       | Elementary school<br><br>Face-to-face PE lessons, programmed into the school curriculum                                                                     |
| Peng (2015)      | <ol style="list-style-type: none"> <li>1) Warm-up (i.e., jogging, flexibility, light muscle activity)</li> <li>2) Sport games (i.e., basketball, badminton)</li> </ol>                                                                                                                                                                                                                                                                                                                                                                                                                                                                                                                                                                                                                                                                                                                   | <ol style="list-style-type: none"> <li>1. 80 minutes</li> <li>2. 2 sessions/week</li> <li>3. 12 weeks</li> <li>4. 65%-75% of HR max</li> </ol>                    | NR                                                        | No intervention                                                                                                               | NA                             | Two middle schools In China                                                                                                                                 |

|                     |                                                                                                                                                                                                                                                                                                                                                                                                                                        |                                                                           |                                                                   |                                       |    |                                                                                                                                                                                                                                                  |
|---------------------|----------------------------------------------------------------------------------------------------------------------------------------------------------------------------------------------------------------------------------------------------------------------------------------------------------------------------------------------------------------------------------------------------------------------------------------|---------------------------------------------------------------------------|-------------------------------------------------------------------|---------------------------------------|----|--------------------------------------------------------------------------------------------------------------------------------------------------------------------------------------------------------------------------------------------------|
|                     |                                                                                                                                                                                                                                                                                                                                                                                                                                        |                                                                           |                                                                   |                                       |    | The intervention was delivered as part of the school curriculum                                                                                                                                                                                  |
| Petty (2009)        | High-dose or low-dose aerobic exercise program (i.e., running games, jump rope, basketball and soccer)<br><br>One or two 20-minute bouts of intermittent vigorous exercise interspersed by lower intensity activity                                                                                                                                                                                                                    | 1. 20 or 40 minutes<br>2. 5 sessions/week<br>3. 13 weeks<br>4. Vigorous   | Trained research staff                                            | No intervention                       | NA | Local public school<br><br>The intervention took place on school day afternoons in the research gymnasium<br><br>Children assigned to the intervention group were provided free transportation via school bus to the research gymnasium and back |
| Romero-Perez (2020) | 1) 5-minute warm-up<br>2) Core session (specific aerobic exercises and pre-sport games to develop conditional and coordinative capacities (strength, resistance, coordination and speed))<br>3) 5-minute stretching                                                                                                                                                                                                                    | 1. 50 minutes<br>2. 2 sessions/week<br>3. 20 weeks<br>4. NR               | Research staff                                                    | Usual activities                      | NA | Local primary schools<br><br>Group sessions performed outside physical education classes, as an extracurricular activity                                                                                                                         |
| Roshan (2011)       | Pool walking exercise                                                                                                                                                                                                                                                                                                                                                                                                                  | 1. ~30 minutes<br>2. 3 sessions/week<br>3. 6 weeks<br>4. 60-70% of HR max | Research staff                                                    | No intervention                       | NA | NR                                                                                                                                                                                                                                               |
| Roth (1987)         | Running and brisk walking                                                                                                                                                                                                                                                                                                                                                                                                              | 1. 30 minutes<br>2. 3 sessions/week<br>3. 11 weeks<br>4. 75% of HR max    | Instructor trained in exercise physiology and clinical psychology | No intervention                       | NA | Local university<br><br>The exercise program was structured as a 1 credit-hour college course                                                                                                                                                    |
| Silva (2020)        | Swimming-learning program (i.e., adaptation to the net, leg propulsion, arms, breathing, and crawl and chest coordination exercises) + current medications<br><br>1. Stretching inside the pool and a recreational activity of adaptation to the liquid medium for 5 minutes<br>2. Four to five swimming-learning exercises for 25 minutes<br>3. Recreational activity aimed at swimming for 10 minutes<br>4. Stretching for 5 minutes | 1. 45 minutes<br>2. 2 sessions/week<br>3. 8 weeks<br>4. NR                | Research staff                                                    | No intervention + current medications | NA | UNESC Semi-Olympic thermal swimming pool                                                                                                                                                                                                         |
| Talakoub (2012)     | Aerobic exercise implemented with music + 15-30g of fat-free carbohydrates                                                                                                                                                                                                                                                                                                                                                             | 1. 60 minutes<br>2. 3 sessions/week<br>3. 6 weeks                         | Research staff                                                    | No intervention                       | NA | Endocrine and Metabolism Research Center                                                                                                                                                                                                         |

|                  |                                                                                                                                                                                                                                                                                                                                                                                                                                                                                                                                                               |                                                                              |                                                         |                                                               |                                                         |                                                                                                                                              |
|------------------|---------------------------------------------------------------------------------------------------------------------------------------------------------------------------------------------------------------------------------------------------------------------------------------------------------------------------------------------------------------------------------------------------------------------------------------------------------------------------------------------------------------------------------------------------------------|------------------------------------------------------------------------------|---------------------------------------------------------|---------------------------------------------------------------|---------------------------------------------------------|----------------------------------------------------------------------------------------------------------------------------------------------|
|                  |                                                                                                                                                                                                                                                                                                                                                                                                                                                                                                                                                               | 4. NR                                                                        |                                                         |                                                               |                                                         | (Sedigheh Tahereh Research Center)                                                                                                           |
| Weintraub (2008) | Coed soccer practice<br>1) Supportive, team-building check-in<br>2) Warm-up and stretching<br>3) Soccer skills learning<br>4) Scrimmage                                                                                                                                                                                                                                                                                                                                                                                                                       | 1. ~150 minutes<br>2. 3-4 sessions/week<br>3. 24 weeks<br>4. Vigorous        | Trained undergraduate and medical students              | Health education on nutrition and physical activity           | Trained undergraduate and medical students              | After-school team sports program<br><br>The study was implemented in schools in collaboration with school district personnel                 |
| Williams (2019)  | Playful aerobic activities including vigorous exercises and games (e.g., running games, ball games, jump rope), interspersed with brief rest periods                                                                                                                                                                                                                                                                                                                                                                                                          | 1. 40 minutes<br>2. 5 sessions/week<br>3. 32 weeks<br>4. Vigorous            | Research staff                                          | Sedentary activities (e.g., board games, puzzles, art, music) | Research staff                                          | After-school program<br><br>Participants were transported by bus daily to the Georgia Prevention Institute for the after-school intervention |
| Wunram (2017)    | Ergometer training                                                                                                                                                                                                                                                                                                                                                                                                                                                                                                                                            | 1. 30 minutes<br>2. 3-5 sessions/week<br>3. 6 weeks<br>4. NR                 | Research staff                                          | Treatment as usual                                            | Psychotherapist or psychiatrist                         | Rehabilitation and physiotherapy training rooms of the University Hospital of Cologne                                                        |
| Yu (2020)        | Phases of the intervention:<br>1. Supportive environment – obtain teacher’s cooperation and supervision, obtain parental participation and supervision, advance health propaganda<br>2. Intervention implement – Compulsory exercise (i.e., jogging 20 min in the morning break every weekday; rope skipping 40 min on Mon and Thu; play badminton 40 min on Wed and Fri; 200-m relay race 40min on Tue) and lifestyle modification (health education on physical activity and diet)<br>3. Quality control – training, feedback, improve the education method | 1. 60 minutes<br>2. 5 sessions/week<br>3. 30 weeks<br>4. Vigorous            | Parents and teachers                                    | Wait list                                                     | NA                                                      | Local primary schools<br><br>Interventions delivered as part of the school curriculum                                                        |
| Zhang (2021)     | Running on indoor treadmill or alternating running and fast walking on outdoor playground + Sertraline and Fluoxetine                                                                                                                                                                                                                                                                                                                                                                                                                                         | 1. 50-60 minutes<br>2. 3 sessions/week<br>3. 16 weeks<br>4. 64%-96%of HR max | Chief physician, senior nurse and several junior nurses | Sertraline and Fluoxetine                                     | Chief physician, senior nurse and several junior nurses | Zhejiang Provincial Hospital of Traditional Chinese Medicine                                                                                 |

## **eAppendix 1. Search Strategy**

### **PubMed**

(((((kids[Title/Abstract] OR school[Title/Abstract] OR juvenil\*[Title/Abstract] OR student\*[Title/Abstract] OR pediatric\*[Title/Abstract] OR paediatric\*[Title/Abstract] OR girl\*[Title/Abstract] OR boys[Title/Abstract] OR youth\*[Title/Abstract] OR child\*[Title/Abstract] OR adolescen\*[Title/Abstract] OR young[Title/Abstract] OR teen\*[Title/Abstract] OR children[MeSH Terms] OR adolescent[MeSH Terms]) AND (exercise[Title/Abstract] OR aerobic exercise[MeSH Terms] OR physical activity[Title/Abstract] OR physical activity[MeSH Terms] OR sport[Title/Abstract] OR leisure[Title/Abstract] OR walk\*[Title/Abstract] OR swim\*[Title/Abstract] OR cycl\*[Title/Abstract] OR running[Title/Abstract] OR aerobic[Title/Abstract])) AND (depress\*[Title/Abstract] OR depressive symptom[MeSH Terms] OR dysthymi\*[Title/Abstract] OR emotion\*[Title/Abstract] OR mood\*[Title/Abstract] OR affective[Title/Abstract] OR mental[Title/Abstract])) AND ((allocation, random[MeSH Terms] OR randomized controlled trials as topic[MeSH Terms]) OR (random\*[Title/Abstract] AND control\*[Title/Abstract])))

### **CINAHL**

((((kids OR school OR juvenil\* OR student\* OR pediatric\* OR paediatric\* OR boys OR girl\* OR youth\* OR child\* OR adolescen\* OR teen\* OR young) OR SU (children or adolescents or youth or child or teenager)) AND ((exercise OR physical activity OR sport\* OR leisure OR walk\* OR running OR swim\* OR cycl\* OR aerobic) OR SU (exercise or physical activity)) AND ((depress\* OR dysthym\* OR emotion\* OR affective OR mood OR mental) OR SU (depression)) AND ((random\* AND control\*) OR SU (randomized))))

### **EMBASE**

((kids.mp. or school.mp. or juvenil\*.mp. or student\*.mp. or pediatric\*.mp. or paediatric\*.mp. or boys.mp. or girl\*.mp. or youth\*.mp. or child\*.mp. or adolescen\*.mp. or teen\*.mp. or young.mp. or exp children/ or exp adolescent/) AND (exp exercise/ or exp physical activity/ or exercise.mp. or physical activity.mp. or sport\*.mp. or leisure.mp. or walk\*.mp. or running.mp. or swim\*.mp. or cycl\*.mp. or aerobic.mp.) AND (exp depression/ or depress\*.mp. or dysthym\*.mp. or emotion\*.mp. or affective.mp. or mood.mp. or mental.mp.) AND (random\* and control).mp

### **SPORTDiscus**

((((kids OR school OR juvenil\* OR student\* OR pediatric\* OR paediatric\* OR boys OR girl\* OR youth\* OR child\* OR adolescen\* OR teen\* OR young) OR SU (children or adolescents or youth or child or teenager)) AND ((exercise OR physical activity OR sport\* OR leisure OR walk\* OR running OR swim\* OR cycl\* OR aerobic) OR SU (exercise or physical activity)) AND ((depress\* OR dysthym\* OR emotion\* OR affective OR mood OR mental) OR SU (depression or depressive disorder or depressive symptoms or major depressive disorder)) AND ((random\* AND control\*) OR SU (random sampling))))

### **PsychINFO**

((kids OR school OR juvenil\* OR student\* OR pediatric\* OR paediatric\* OR boys OR girl\* OR youth\* OR child\* OR adolescen\* OR teen\* OR young) AND (exercise OR physical activity OR sport\* OR leisure OR walk\* OR running OR swim\* OR cycl\* OR aerobic) AND (depress\* OR dysthym\* OR emotion\* OR affective OR mood OR mental) AND (random\* AND control\*))

## **eAppendix 2. Risk-of-Bias Assessment**

Bias in the following domains was assessed for each study: 1) Randomization process, 2) Deviations from intended interventions, 3) Missing outcome data, 4) Measurement of the outcome, and 5) Selection of the reported result. To ensure a systematic assessment of the risk of bias, we utilised the Excel template provided in the “Cochrane Handbook for Systematic Reviews of Interventions”,<sup>1</sup> which includes ‘signalling questions’ that can be used to determine risk of bias for each domain.

1. Assessment of bias due to the randomization process was based on whether the allocation of participants was blinded and/or concealed, and whether there were baseline differences between groups suggesting a problem with the randomization process.
2. Assessment of bias due to deviations from intended interventions was based on whether participants were aware of their group assignment during the study, and whether carers and people delivering the intervention were aware of participants’ group assignment.
3. Assessment of bias due to missing outcome data was based on whether data for the outcome of interest was available for all or most of the participants randomized.
4. Assessment of bias due to the measurement of the outcome was based on whether the method for measuring the outcome was appropriate, whether the measurement of the outcome may have differed between groups, and whether the assessors were aware of the interventions received by the participants.
5. Assessment of bias due to selection of the reported result was based on whether a pre-specified statistical analysis plan was used before the data of participants was available, and whether the result was likely to have been selected from multiple outcome measurements and/or statistical analyses.

Overall, the study bias was rated as follows: 1) a study was defined as having a ‘low’ risk of bias if all domains were considered to be at low risk, 2) a study was defined as having ‘some concerns’ if at least one domain raised concerns about the risk of bias, and 3) a study was defined as having a ‘high’ risk of bias if any domain was rated as high risk or if several domains showed some concerns, such that the confidence in the results of the study was substantially lowered.

## **eReference**

Higgins JPT, Savović J, Page MJ, Elbers RG, Sterne JAC. Chapter 8: Assessing risk of bias in a randomized trial. In: Higgins JPT, Thomas J, Chandler J, Cumpston M, Li T, Page MJ, Welch VA (editors). *Cochrane Handbook for Systematic Reviews of Interventions* version 6.3 (updated February 2022). Cochrane, 2022. Available from [www.training.cochrane.org/handbook](http://www.training.cochrane.org/handbook).
